# Determinants of SARS-CoV-2 transmission to guide vaccination strategy in an urban area

Sarah C. Brüningk<sup>1,2,\*</sup>, Juliane Klatt<sup>1,2,\*</sup>, Madlen Stange<sup>2,3,5,\*</sup>, Alfredo Mari<sup>2,3,5</sup>, Myrta Brunner<sup>3,4</sup>, Tim-Christoph Roloff<sup>2,3,5</sup>, Helena M.B. Seth-Smith<sup>2,3,5</sup>, Michael Schweitzer<sup>3,5</sup>, Karoline Leuzinger<sup>6,15</sup>, Kirstine K. Sogaard<sup>3,5</sup>, Diana Albertos Torres<sup>3,5</sup>, Alexander Gensch<sup>3</sup>, Ann-Kathrin Schlotterbeck<sup>3</sup>, Christian H. Nickel<sup>7</sup>, Nicole Ritz<sup>9</sup>, Ulrich Heininger<sup>9</sup>, Julia Bielicki<sup>9</sup>, Katharina Rentsch<sup>10</sup>, Simon Fuchs<sup>12</sup>, Roland Bingisser<sup>7</sup>, Martin Siegemund<sup>11</sup>, Hans Pargger<sup>11</sup>, Diana Ciardo<sup>13</sup>, Olivier Dubuis<sup>13</sup>, Andreas Buser<sup>14</sup>, Sarah Tschudin-Sutter<sup>8</sup>, Manuel Battegay<sup>8</sup>, Rita Schneider-Sliwa<sup>4</sup>, Karsten M. Borgwardt<sup>1,2,+</sup>, Hans H. Hirsch<sup>6,8,15,+</sup>, Adrian Egli<sup>3,5,+†</sup>

<sup>1</sup>*Machine Learning & Computational Biology, Department of Biosystems Science and Engineering, ETH Zurich, Basel, Switzerland*

<sup>2</sup>*Swiss Institute for Bioinformatics (SIB), Lausanne, Switzerland*

<sup>3</sup>*Applied Microbiology Research, Department of Biomedicine, University of Basel, Basel, Switzerland*

<sup>4</sup>*Human Geography, Department of Environmental Sciences, University of Basel, Basel, Switzerland*

<sup>5</sup>*Clinical Bacteriology and Mycology, University Hospital Basel & University of Basel, Basel, Switzerland*

<sup>6</sup>*Clinical Virology, University Hospital Basel & University of Basel, Basel, Switzerland*

<sup>7</sup>*Emergency Department, University Hospital Basel, Basel, Switzerland*

<sup>8</sup>*Infectious Diseases and Hospital Epidemiology, University Hospital Basel & University of Basel,*

22 *Basel, Switzerland*

23 <sup>9</sup>*Paediatric Infectious Diseases and Vaccinology, University of Basel Children's Hospital Basel*

24 *and University of Basel, Basel, Switzerland*

25 <sup>10</sup>*Laboratory Medicine, University Hospital Basel, Basel, Switzerland*

26 <sup>11</sup>*Intensive Care Medicine, University Hospital Basel, Basel, Switzerland*

27 <sup>12</sup>*Health Services for the Basel-City, Basel, Switzerland*

28 <sup>13</sup>*Viollier AG, Allschwil, Switzerland*

29 <sup>14</sup>*Regional Blood Transfusion Service, Swiss Red Cross, Basel, Switzerland*

30 <sup>15</sup>*Transplantation & Clinical Virology, Department Biomedicine, University of Basel, Basel,*  
31 *Switzerland*

32 *\*These authors contributed equally to this work*

33 *+These authors share senior authorship*

34 *†corresponding author*

## 35 **Research in context**

36 **Evidence before this study:** We searched Google Scholar, PubMed, and medRxiv for articles  
37 with the keywords 'SARS-CoV-2', 'transmission', 'phylogeny', 'city', and 'model' as of February  
38 2021 and evaluated the relevant abstracts and study details where appropriate. The identi-  
39 fied studies predominantly evaluated SARS-CoV-2 transmission within large metropolises with  
40 only a few studies reporting on European cities, including analyses of London and Geneva. We  
41 noted, that studies (even outside Europe) generally differentiated between either phylogenetic

42 analysis or a dynamic modelling approach and did not combine the two, despite the different  
43 aspects described. Moreover, the majority of studies evaluate publicly available data for mod-  
44 elling SARS-CoV-2 transmission and to estimate effective reproductive numbers. Such analyses  
45 naturally lack a direct relation of cases and relevant socioeconomic, or geographical informa-  
46 tion on a per case basis. To date, whole-genome-sequencing information has not been used  
47 to clearly identify inherently related cases for modelling transmission behaviour in any of the  
48 studies assessed. Finally, of the modelling studies reported, none provided a data-driven es-  
49 timate of vaccine scenarios in a city, for which all model parameters were identified from the  
50 same source.

51 **Added value of this study:** In this comprehensive study we examine SARS-CoV-2 transmission  
52 patterns within a medium-sized European city. We benefit from a rich data set allowing us  
53 to combine phylogenetic clustering with compartmental modelling based exclusively on se-  
54 quenced and inherently related cases that are mapped to a residential address, and hence cou-  
55 pled with socioeconomic and demographic information. This allows us to evaluate population  
56 groups driving SARS-CoV-2 transmission and to quantify relevant effective reproductive num-  
57 bers. Moreover, we identify both traceable and cryptic transmission chains allowing us to sug-  
58 gest which measures (such as vaccination vs. effective contact tracing) would be most effective  
59 for each group.

60 **Implications of all the available evidence:** Depending on the specific characteristics of the  
61 vaccine, we estimate that vaccination of exclusively the senior population groups will reduce  
62 intensive-care-unit occupancy, but overall case number would more effectively be contained

63 by prioritising highly mobile population groups from a socioeconomically weaker background  
64 (i.e. transmission drivers), even in the context of comparably shallow socioeconomic gradients  
65 within a wealthy European urban area. We identified predominantly clustered transmission  
66 amongst more senior or more affluent and less mobile population groups, which implies that  
67 extensive testing strategies could be used to more effectively prevent SARS-CoV-2 transmission  
68 among these groups. By contrast, mobile, low-income population groups were characterized  
69 by cryptic transmission. These are very important findings which could be considered in future  
70 vaccine prioritization designs for comparable urban areas.

71

72 **Background. Transmission chains within small urban areas (accommodating ~30% of the**  
73 **European population) greatly contribute to case burden and economic impact during the**  
74 **ongoing COVID-19 pandemic, and should be a focus for preventive measures to achieve con-**  
75 **tainment. Here, at very high spatio-temporal resolution, we analysed determinants of SARS-**  
76 **CoV-2 transmission in a European urban area, Basel-City (Switzerland).**

77 **Methods. We combined detailed epidemiological, intra-city mobility, and socioeconomic**  
78 **data-sets with whole-genome-sequencing during the first SARS-CoV-2 wave. For this, we**  
79 **succeeded in sequencing 44% of all reported cases from Basel-City and performed phyloge-**  
80 **netic clustering and compartmental modelling based on the dominating viral variant (B.1-**  
81 **C15324T; 60% of cases) to identify drivers and patterns of transmission. Based on these**  
82 **results we simulated vaccination scenarios and corresponding healthcare-system burden**  
83 **(intensive-care-unit occupancy).**

84 **Findings. Transmissions were driven by socioeconomically weaker and highly mobile popu-**  
85 **lation groups with mostly cryptic transmissions, whereas amongst more senior population**  
86 **transmission was clustered. Simulated vaccination scenarios assuming 60-90% transmis-**  
87 **sion reduction, and 70-90% reduction of severe cases showed that prioritizing mobile, so-**  
88 **cioeconomically weaker populations for vaccination would effectively reduce case numbers.**  
89 **However, long-term intensive-care-unit occupation would also be effectively reduced if se-**  
90 **nior population groups were prioritized, provided there were no changes in testing and pre-**  
91 **vention strategies.**

92 **Interpretation. Reducing SARS-CoV-2 transmission through vaccination strongly depends**  
93 **on the efficacy of the deployed vaccine. A combined strategy of protecting risk groups by**  
94 **extensive testing coupled with vaccination of the drivers of transmission (i.e. highly mobile**  
95 **groups) would be most effective at reducing the spread of SARS-CoV-2 within an urban area.**

96 **Funding: No dedicated funding was used for this work.**

## 97 **Introduction**

98 Efforts to understand transmission of SARS-CoV-2 have been undertaken at different scales in-  
99 cluding at a global level<sup>1-3</sup>, across continents (Europe and North America<sup>4</sup>), within countries  
100 (Austria<sup>5</sup>, Brazil<sup>6</sup>, France<sup>7</sup>, Iceland<sup>8</sup>, South Africa<sup>9</sup>, Thailand<sup>10</sup>) and in large cities (Beijing<sup>11</sup>,  
101 Boston<sup>12</sup>, Houston<sup>13</sup>, and New York City<sup>14-16</sup>). In Europe, ~30% of the population live in small  
102 urban areas (10k – 300k inhabitants)<sup>17</sup>, which accordingly play a major role in SARS-CoV-2  
103 transmission yet have not been studied. Moreover, to date city-based studies of SARS-CoV-

104 2 transmission have very limited resolution in terms of the proportion of sequenced positive  
105 cases (incomplete transmission chains), have a paucity of socioeconomic or mobility data (in-  
106 complete determinants), or fail to combine analysis of transmission clusters with quantita-  
107 tive, descriptive models accounting for population mixing<sup>18</sup>. Of those studies describing the  
108 distribution of cases together with changes in mobility, none to date rigorously study socioe-  
109 conomic differences between city quarters as determinants of transmission<sup>13,15,16,19</sup>. An inte-  
110 grated model considering all of these factors (including epidemiological, geographic, mobil-  
111 ity, socioeconomic, transmission dynamics information) is anticipated to provide profound  
112 insights into the determinants underpinning transmission, that can be used to guide the de-  
113 livery of vaccines. We here present such an integrated analysis for Basel-City which is part of  
114 a metropolitan area, a functional urban area, and a European cross-border area as outlined in  
115 the supplement. Basel-City is hence representative of other areas in the EU classified as such.  
116 Local interventions are most effective in cutting transmission chains in families, and small  
117 community networks<sup>20,21</sup> that represent well-defined (phylogenetic or epidemiological) clus-  
118 ters. However, most infections are acquired from unknown sources and transmitted crypti-  
119 cally making it essential to identify the key determinants and transmission routes at the city-  
120 level to improve interventions and vaccination campaigns. To address this challenge, we have  
121 combined phylogenetic cluster analysis<sup>22</sup> and compartmental ordinary differential equation  
122 (ODE) modelling based on high density (81% of reported cases assessed), and high resolution  
123 (spatial:housing blocks, temporal: day-by-day) epidemiological, mobility, socioeconomic, and  
124 serology (estimate unreported cases) data-sets from the first COVID-19 wave (February-April

125 2020). Whole genome sequencing (WGS) of all included cases (44% of all cases successful) al-  
126 lowed the analysis be restricted to a single, dominant viral variant (B.1-C15324T, 60% of cases  
127 <sup>23</sup>). This ensured that our analyses focused on inherently related cases and enabled estimation  
128 of effective reproductive numbers for different socioeconomic and demographic population  
129 subgroups to provide the basis for vaccination scenario building.

## 130 **Methods**

131 Detailed methods are given in the supplements.

132 **Included data.** All analyses were based on PCR-positive (750/7073 tests) cases of residents of  
133 Basel-City between February 25<sup>th</sup> and April 22<sup>nd</sup> 2020, obtained from the University Hospital  
134 Basel, covering 81% of all reported cases in the relevant interval and location. All samples were  
135 subjected to WGS, 53% resulted in high quality genomes (i.e. 44% of all cases). Of these 247  
136 (247/411, 60%) contained the monophyletic C15324T mutation in the B.1 lineage (B.1-C15324T)  
137 and were used for further analysis. Each case was linked to the patient's place of residence  
138 anonymized to one of 1,078 statistical housing-blocks. For each of these housing-blocks, where  
139 privacy legislation permitted, Basel-City's Cantonal Statistical Office provided socioeconomic  
140 indicators for the year of 2017 (most recent available). These included (i) living space (per capita  
141 in  $m^2$ ), (ii) share of 1-person private households, (iii) median income (CHF), and (iv) popula-  
142 tion seniority (percentage of citizens aged over 64 years). According to these indicators, blocks  
143 were allocated to one of three socioeconomic tertiles (T1:  $\leq$ 33rd percentile, T2: 33rd to 66th

144 percentile, T3:>66th percentile, N/A: no available data or censored) where possible (e.g. Figure  
145 2A). Generally, sparsely populated blocks displayed a maximum of three positive cases and had  
146 to be excluded from analysis. All following analyses with respect to socioeconomic factors were  
147 based on these partitions.

148 We determined SARS-CoV-2 antibody responses in 2,019 serum samples collected between 25<sup>th</sup>  
149 of February and 22<sup>nd</sup> of May 2020 to account for delayed seroconversion (see supplement for  
150 details). An estimated 1.9% (38/2,019) of the Basel-City population was infected with SARS-  
151 CoV-2, corresponding to 88% unreported cases for the sequenced B.1-C15324T variant (see sup-  
152 plement).

153 Finally, we included data on the number and age distribution of COVID-19 intensive-care unit  
154 (ICU) patients during the relevant period from University Hospital Basel, a tertiary hospital with  
155 a capacity of 44 ICU beds: 4.5% of reported SARS-CoV-2 positive cases were admitted to ICU  
156 and median length of ICU stay was 5.9 days (IQR, 1.5-12.9). 40% of these patients were younger  
157 than 64 years.

158 **Phylogenetic inference and cluster analysis.** SARS-CoV-2 genomes were phylogenetically anal-  
159 ysed in a global context as described previously<sup>23</sup> (see supplements). Phylogenetic clusters were  
160 consolidated with epidemiological data (occupation in a health service job, resident of a care  
161 home, contact to positive cases, onset of symptoms, place of infection) to confirm the suitability  
162 of the divergence parameter chosen and then combined with ancillary geographic (quar-  
163 ter), and socioeconomic information as described above. We inferred statistical significance for



164 clusters in respective tertiles.

165 **Mobility data.** We employed the official traffic model provided by the traffic department of  
166 Basel-City<sup>24</sup> consisting of the 2016 average A-to-B traffic on a grid of ~1400 counting zones  
167 for foot, bike, public motorized and private motorized transport. We computed the spatial  
168 variation of mobility within and between each of the socioeconomic partitions (see supple-  
169 ment) resulting in a unity-normalized three-by-three mobility matrix  $M_{jk}$  representing rela-  
170 tive within-tertile/inter-tertile mobility on/off its diagonal. Additionally, weekly averages of  
171 pass-by traffic for combined foot-bike traffic, as well as private motorized traffic were obtained  
172 together with weekly public-transport passenger loads (from SBB Swiss Federal Railways and  
173 Basel-Verkehrsbetriebe). These were combined in a weighted sum according to the relevant  
174 transport mode contribution, normalized and smoothed with a uni-variate spline to obtain the  
175 final temporal mobility variation,  $\alpha_{mob}(t)$ .

176 **Dynamic changes in social interaction.** SARS-CoV-2 transmission is contact-based. While  
177 the number of contacts is largely influenced by human mobility, the risk of a contact becoming a  
178 transmission event is further determined by the precautions taken by the individuals in contact  
179 (washing hands, wearing masks, distance keeping) resulting in an effective, time-dependent  
180 reproductive number  $R_{eff}(t)$ . We derive the relevant time-dependence of  $R_{eff}(t)$  by applying a  
181 Kalman filter<sup>25,26</sup> to the piece-wise linearised time-series of daily confirmed B.1-C15324T cases.  
182 Assuming a multiplicative model, the time-dependence of transmission risk stemming from

183 social interaction  $\alpha_{soc}(t)$ , is obtained by point-wise division of the time-dependence of  $R_{eff}(t)$   
184 by  $\alpha_{mob}(t)$  (Figure 2D).

185 **SEIR-model.** We used a compartmental two-arm susceptible-exposed-infected-recovered (SEIR)  
186 model<sup>19,27,28</sup> including sequenced and unsequenced/unreported cases that is outlined in Fig-  
187 ure S1. The initial number of susceptibles was fixed to the relevant population. All other com-  
188 partments were initialized as zeros, apart from a seed in  $E$  corresponding to the first reported  
189 cases. In summary, our model is based only on six free parameters: the reproductive number  
190 per tertile  $R_j$  (three parameters, range [0,20]), the initial number of exposed in a single ter-  
191 tile (range [0,5]), and the infectious times  $T_{infU}$  and  $T_{infP}$  (range [1.5,12] days). We assumed  
192 a latency period  $T_{inc}$  of two days<sup>29</sup>. Model fitting and evaluation are described in the supple-  
193 ment. Results are shown as mean values over 50 bootstraps with bootstrap uncertainty bands.  
194 We compare effective reproductive numbers corresponding to the normalization of  $R$  by the  
195 effective mobility contribution ( $\sum_k M_{jk}$ ):

$$196 \quad R_{eff,j} = \frac{R_j}{\sum_k M_{jk}} \quad (1)$$

197 Significance levels are scored based on a comparison to 99 random partitions of the statistical  
198 blocks (see Table S1).

199 **Scenario simulation.** The impact of mobility relative to social interaction was analysed by re-  
200 calculating the predicted epidemic trajectory under the constraint of constant ( $\alpha_{mob}(t) = 1$ ) or  
201 fully restricted ( $\alpha_{mob}(t) = 0$ ) mobility. These scenarios were compared to the baseline of ob-

202 served reduction in mobility.

203 Vaccination scenarios were simulated for 70-90% effective vaccines to prevent COVID-19<sup>30-32</sup>,  
204 as well as 60% and 90% efficacies to prevent SARS-CoV-2 transmission. The effectively immu-  
205 nized fraction of the population was moved to the recovered compartment  $U_r$ . We accounted  
206 for a change in social interaction behaviour following vaccination by assigning a mean social  
207 interaction score of the vaccinated and not-vaccinated population amongst the initial suscep-  
208 tibles ( $\alpha_{soc,vacc}(t) = 0.75$ ,  $\alpha_{soc,novacc}(t) = 0.5$ ). Full mobility was modelled ( $\alpha_{mob}(t) = 1$ ) after a  
209 single exposed individual was introduced into each of the tertiles. All scenarios were compared  
210 to the no-vaccine case (V0): vaccination of a fixed population fraction at random (V1); vacci-  
211 nation of different population groups (V2: exclusively from T1 median income, V3: exclusively  
212 from T3 seniority, V4: 50% from T1 median income, 50% from T3 seniority). In addition to  
213 case numbers, the time to reach 50% of ICU capacity was determined as quantifiable endpoint  
214 indicating healthcare system burden. In case of not-random vaccination, we adjusted the rele-  
215 vant fraction of ICU cases based on the represented proportions of senior population fractions  
216 within all susceptibles.

## 217 Results

218 **SARS-CoV-2 spread and clustering.** We observed 29 viral lineages in Basel-City (Figure S10),  
219 with 247 genomes (60.0%) belonging to the B.1-C15324T variant<sup>23</sup> (Figure 1A, B). Applying a  
220 genetic divergence threshold, a total of 128 phylogenetic clusters were determined across all  
221 samples, of which 70 belonged to lineage B.1-C15324T (Figure 1C). Mapping phylogenetic clus-

222 ters onto tertiles of socioeconomic and demographic determinants, we found that for median  
223 income, T1 contained the most and T3 the least clusters (Figure 1C). Most within- and among-  
224 tertile transmission clusters were spread randomly, except for significant within-tertile trans-  
225 missions among high median income households (T3) (Figure 1D). Further, we observed that  
226 SARS-CoV-2 isolates were more likely to belong to the same phylogenetic cluster for blocks with  
227 either the highest living space per person, lowest share of 1-person households, or highest se-  
228 niority (Figure 1E). This is also true among people living in the more affluent quarters Riehen,  
229 Bruderholz, Am Ring, and Iselin, who transmitted the virus in their social networks either in the  
230 same quarter or in the same socioeconomic rank (Figure S9). By contrast, positive cases that  
231 belong to lower socioeconomic/demographic tertiles (either lower income, less living space,  
232 or younger age) are less likely to be members of the same tight phylogenetic cluster, indicat-  
233 ing cryptic transmission predominates among lower socioeconomic and younger demographic  
234 groups.

235 **Spatio-temporal variation of mobility and social interaction patterns.** Figure 2A and Figures  
236 S2-S4 show Basel-City's partition and the corresponding mobility graph. Importantly, the sta-  
237 tistical blocks per tertile do not form a single, geographically connected, entity. We observe that  
238 mobility varies by transport modality and tertile (Figure 2A inset). For example, for low-median  
239 income (T1) the share of private motorized traffic and mobility is more pronounced than in the  
240 tertiles of higher median income (T2 and T3).  
241 Figure 2B shows for each partition the summed edge weights of the mobility graph accounting

242 for the mobility contribution to the final effective reproductive number. We observe that low  
243 and median income populations are more mobile than their wealthier counterparts. Moreover,  
244 there is little mobility within areas with a low share of 1-person households, a result of the pre-  
245 dominantly peripheral location of the relevant statistical blocks (see Figure S6). For living space  
246 per person or percentage of senior citizens, mobility was comparable between tertiles with a  
247 trend towards higher mobility within the younger population groups.

248 Dynamic changes in mobility were assessed by agglomerating normalized traffic counts for  
249 public and private transport modalities (Figure 2C). There was a clear drop in mobility for both  
250 public and private transport modes around the onset of the national lockdown date (12th March  
251 2020). The decrease was more pronounced for public transport, resulting in a weighted aver-  
252 age mobility drop of approximately 50% (Figure 2D). Figure 2D also shows the dynamic change  
253 in social interaction contribution to B.1-C15324T case numbers. Despite noticeable fluctua-  
254 tion, social interaction contribution decreased on average over time. This data also reflects  
255 variation in case reporting which affected the estimated effective reproductive number. Im-  
256 portantly, since the B.1-C15324T variant was eventually eradicated despite non-zero mobility,  
257 a final social interaction contribution of zero was expected.

258 **Spatio-temporal spread of the epidemic and its socioeconomic determinants.** Unreported  
259 cases appeared to be a driving force of the transmission (88% for the sequenced B.1-C15324T  
260 variant). Figures 3A-C (Figures S5-S7A-C) show the SEIR-model fit to data for each median in-  
261 come tertile. The corresponding dynamic change of the effective reproductive number ( $R_{eff}$ ) is

262 given in Figures 3D-F (Figures S5-S7D-F). Independent of the underlying partition, the model  
263 provided adequate fits ( $RMSE < 4.5$ ) and we observed a drop in  $R_{eff}$  following the dynamic  
264 changes in mobility and social interaction. Importantly, there was a significant difference (2%  
265 achieved significance) in  $R_{eff}$  between statistical blocks of the highest and lowest median in-  
266 come. For all socioeconomic partitions these differences are summarized as histograms in Fig-  
267 ures 3G-J. Here, we found that blocks with higher living space per person (1% achieved sig-  
268 nificance), or higher median income (2% achieved significance), or or lower share of 1-person  
269 households (2% achieved significance) had a significantly lower  $R_{eff}$  ( $< 1.7$ ) compared to the  
270 maximum  $R_{eff}$  observed in the relevant partition (Table S1). A partitioning based on the share  
271 of senior residents did not result in significant differences in  $R_{eff}$  (45% achieved significance).  
272 Differences in  $R_{eff}$  are due to two factors: the effective mobility contribution (Figure 2B), and  
273 the modelled reproductive number ( $R$ , eq.(8)). In particular, the tertile with the lowest share of  
274 1-person households (T1) showed less mobility compared to T2 and T3, leading to significant  
275 differences in  $R_{eff}$ . By contrast, mobility in the T1 and T3 tertiles of living space per person  
276 were similar (Figure 2B), yet differences in  $R_{eff}$  were significant, indicating that the transmis-  
277 sion was not dominated by mobility alone.

278 **Impact of mobility changes and modelling of vaccination scenarios.** We simulated the de-  
279 velopments of the first wave of the epidemic under the assumption of different mobility sce-  
280 narios and modelled two future vaccination strategies. Figure 4A (Figures S5-S7G) displays the  
281 results for mobility scenarios as observed with up to 50% mobility reduction (scenario MO),

282 100% mobility (scenario M1), and no mobility (scenario M2). Peak case numbers (April 12<sup>th</sup>)  
283 would have been approximately three times higher in the case of no reduction in mobility (M1).  
284 However, the decrease in peak case numbers assuming zero mobility (M2) as modelled, was not  
285 as pronounced. Mobility reduction hence played a vital role for the containment of SARS-CoV-  
286 2.

287 Figure 4B (Figures S5-S7H) shows the results for an outbreak scenario (denoted as V1) in which  
288 a specific fraction of the population (33% or 66%) received a vaccine that provided either 60% or  
289 90% vaccine transmission reduction, with 90% severe COVID-19 case prevention. As expected,  
290 we observe that higher vaccine efficacy or higher population fraction vaccinated reduces the  
291 slope and plateau of the epidemic curve. Scenarios for less effective vaccines are shown in  
292 Figure S11. Effectiveness to prevent severe COVID-19 solely affects the rate of severe cases  
293 and hence ICU occupancy and the time point of reaching 50% ICU occupancy (Figure 4B vs.  
294 Figure S11E). It should be noted, that vaccination of the population at random is an artificial  
295 scenario, applied here only to demonstrate the impact of vaccination efficacy relative to the  
296 population fraction vaccinated. This scenario serves as a baseline comparison for two more  
297 realistic vaccination strategies given in Figure 4C. Here, as a proof of concept, vaccines that  
298 provide 90% transmission reduction, and 90% reduction of severe cases are delivered to 23%  
299 of the population are presented. For scenario V2, vaccination is prioritized in what we deter-  
300 mined as determinants of SARS-CoV-2 transmission – individuals with low income, who have  
301 fewer options to socially distance (e.g. by working from home) and hence were more likely to be  
302 exposed to and/or transmit the virus (reflected by a higher  $R_{eff}$ ). With this strategy, the slope

303 of the epidemic curve would be reduced compared to randomly vaccinating the same number  
304 of subjects from the whole population. Figure 4D describes the corresponding development  
305 of ICU occupancy for the scenarios modelled, revealing that scenario V2 leads to a delay of  
306 approximately 11 days to reach the 50% ICU capacity mark as compared to scenario V1. In sce-  
307 nario V3, resembling the approach by several countries, priority was given to the population  
308 group with the highest share of senior residents, which had lower mobility than the rest of the  
309 population (Figure 2B) but constitutes 60% of ICU cases. We observe that scenario V3 resulted  
310 in a marginally steeper epidemic curve (Figure 4C) and would yield 50% ICU capacity at a sim-  
311 ilar time as a random vaccination strategy (Figure 4D). However, the total number of cases at  
312 this time would be approximately double in scenario V3 compared to V1 (Figure 4C), whereas  
313 the overall peak ICU occupancy would be lowest in V3 (Figure 4D). These simulations suggest  
314 that - in case of vaccines reducing SARS-CoV-2 transmission - vaccination of population groups  
315 driving transmission are most effective in reducing the slope of the epidemic curve, whereas  
316 vaccination of high-risk groups reduces healthcare system burden in the long term. The pre-  
317 sented effects strongly depend on the specific vaccine characteristics and population fraction  
318 vaccinated. In Figure 4E, F we finally show the potential effects of a mixed vaccination scenario  
319 giving equal priority to senior and highly mobile population groups as a representative exam-  
320 ple. This mixed mode provides a possible compromise with lower case numbers compared to  
321 V1, but also delayed and reduced ICU occupancy relative to V1.



## 322 **Discussion**

323 This analysis evaluates complementary aspects of the spread of SARS-CoV-2 within a medium-  
324 sized European urban area, including local transmission analysed by phylogenetic tree infer-  
325 ence and clustering, and the overall spread described by a compartmental SEIR-model enabling  
326 simulation of vaccination strategies. The main strength of this study lies in the high degree of  
327 diverse and detailed data included as well as the complementary models and analyses.

328 Patterns of SARS-CoV-2 transmission have previously been discussed from different angles ei-  
329 ther via network and transmission modelling<sup>33</sup>, by statistical evaluation<sup>34</sup>, or by phylogenetic  
330 clustering based on genomic sequencing data<sup>35</sup>. Independent of model choice, the importance  
331 of socioeconomic factors has been suggested previously<sup>18,33</sup>. However, analyses focused on  
332 metropolitan areas only may be biased towards their underlying socioeconomic and demo-  
333 graphic characteristics making it important to also quantify SARS-CoV-2 transmission in other  
334 urban areas, such as in a city context, as well as in countries across all continents and stages  
335 of economic potential. Modelling studies provide the foundation of scenario predictions and  
336 estimation of effective reproductive numbers but require balancing the trade-off between de-  
337 tail described and the number of data points available. Accordingly, many published models  
338 rely on publicly available case numbers without being able to directly relate socioeconomic  
339 parameters and specific geographic locations per case, and/or are only performed for large  
340 metropolitan areas<sup>19</sup>. This has led to biases in evaluations and the neglect of a considerable  
341 population share living outside major cities (53%/41% in Europe/worldwide)<sup>36,37</sup>. In this study  
342 we chose Basel-City as a case study of a European urban area. Despite the strong economic

343 status of Switzerland, implying potentially less extreme socioeconomic gradients than other  
344 countries, we demonstrate that socioeconomic background impacts the probability to acquire  
345 and transmit SARS-CoV-2. It would be expected that in cities containing more pronounced  
346 socioeconomic gradients, these disparities would emphasize transmission patterns of SARS-  
347 CoV-2 between and within socioeconomic groups.

348 The success of our analyses is based on the optimized choice of evaluation and model, high  
349 data-density and -quality, rather than large absolute case numbers. It is difficult to distinguish  
350 the spread of competing viral variants within the same population and to account for new intro-  
351 ductions in a model since classical ODE or agent-based models are relying on the assumption  
352 of uninterrupted transmission chains. Sequencing information is essential to reliably inform  
353 on such transmission patterns. Yet given the cost of such analyses, WGS covering entire epi-  
354 demic waves is often unfeasible. We included 81% of all reported cases in the study time frame  
355 and geographic area, which allowed us to restrict our analysis to a subset of 247 phylogenet-  
356 ically related cases consisting of a single SARS-CoV-2 variant. Given the ~200k inhabitants of  
357 Basel-City, this implies one of the largest per-capita sequencing densities of reported studies  
358 to date. We deliberately choose a simple way to incorporate socioeconomic, demographic and  
359 mobility information into our compartmental model since more complex network approaches  
360 would be unfeasible for limited case numbers. The use of mobility and socioeconomic data in  
361 our models is unique since we include regularly collected data analysed by the statistical office  
362 of Basel-City, providing a high spatial and temporal resolution network of the inner city mo-  
363 bility patterns. In contrast to mobile phone data<sup>16,19,33,38</sup> our data is not subjected to privacy

364 legislation and is hence expected to be more readily available for other medium-sized urban  
365 areas around the world, making our analysis transferable. We do not hold information on the  
366 duration and specific location of individuals, but a continuum estimate of population mixing  
367 that aligns well with the concept of a compartmental ODE model. Mobility and the reduction  
368 thereof have been suggested as a proxy to evaluate the reduction of the spread of SARS-CoV-2  
369 <sup>6,38,39</sup>; however, there has also been a change in hygiene practices and social interaction be-  
370 haviour. In our SEIR-model we separate these two contributions allowing for an easier transla-  
371 tion of our model for scenario building. We further addressed unreported cases which were the  
372 driving force of infection outside the observed clusters. Our 77% estimate of unreported cases  
373 overall (not limited to B.1-C15324T) falls within the range of previous reports within Europe<sup>8,40</sup>.  
374 The SEIR-model evaluates general trends of transmission, such as effective reproductive num-  
375 bers, and vaccine scenario building. To complement this, we employ phylogenetic analysis  
376 to identify transmission clusters. This comprehensive evaluation showed that socioeconomic  
377 brackets characterized by low median income and smaller living space per person, were asso-  
378 ciated with significantly larger effective reproductive numbers. In line with previous results<sup>33</sup>,  
379 we suggest that population groups from a weaker socioeconomic background are more mobile  
380 and at higher risk for SARS-CoV-2 infection/transmission originating from multiple sources via  
381 cryptic transmission. This aligns with the possibility that low socioeconomic status may relate  
382 to jobs requiring higher personal contact, and unavoidable mobility<sup>41</sup>, which has been shown to  
383 increase the risk of infection by 76%<sup>42</sup>. By contrast, phylogenetic clusters were predominantly  
384 discovered within higher socioeconomic, or more senior groups, implying a spread within the

385 same social network. It is likely that those individuals are retired, or have had the ability to work  
386 from home, a pattern that has been observed also in other cities<sup>43</sup>. Effective contact tracing and  
387 testing strategies could be most efficient for these groups, which were not driving SARS-CoV-2  
388 transmission.

389 These results should be accounted for during vaccine prioritization depending on the relevant  
390 vaccine characteristics and ICU capacity available. Our simulation framework provides flexi-  
391 bility to model various scenarios and vaccine efficacies but did not account for fatalities due to  
392 limited case numbers during the studied period in Basel-City. In case of a combined effect of  
393 vaccines to both prevent SARS-CoV-2 transmission and protect against COVID-19<sup>44-46</sup>, vaccina-  
394 tion of individuals driving transmission in addition to the protection of high-risk groups would  
395 be ideal to arrive at a combined concept of protection from and containment of SARS-CoV-2.  
396 Vaccinating high-risk groups reduces the number of hospitalized and ICU patients in the short  
397 term, the spread of the pandemic would however, be more effectively contained by vaccinating  
398 the transmission drivers. By restricting vaccination to only risk groups, a larger fraction of the  
399 general population will be exposed to SARS-CoV-2 implying that contact and travel restrictions  
400 would remain necessary to contain transmission. Such measures come at great economic cost.  
401 Based on our results it would be recommended to follow a combined strategy to employ exten-  
402 sive testing where transmission chains are traceable, e.g. among less mobile population groups,  
403 and to combine this with a vaccination strategy aiming to prevent cryptic transmission.

404 In conclusion, high-resolution city-level epidemiological studies are essential for understand-  
405 ing factors affecting pandemic transmission chains and thereby supporting tailored public health

406 information campaigns and vaccination distribution strategies at the municipal level. We here  
407 provided an example of such an analysis within a representative medium-sized European city  
408 at the core of the Greater Basel area and part of the Upper Rhine Region Metropolitan Economy,  
409 which suggests that the findings and modelling approaches presented may be readily translated  
410 to other such areas.

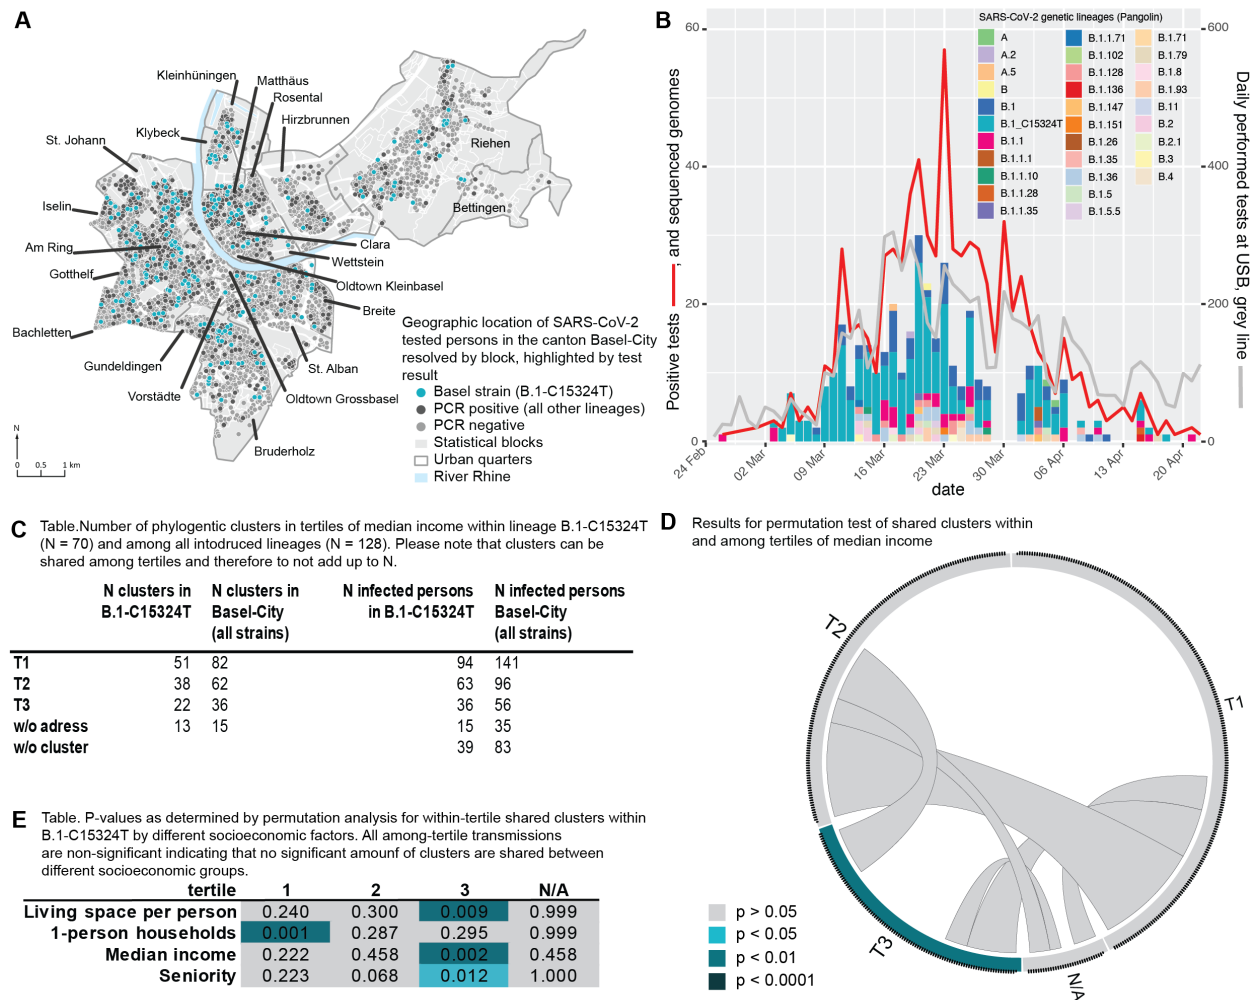

Figure 1: SARS-CoV-2 transmission in and among socioeconomic and demographic groups during the first COVID-19 wave in Basel-City. A) Spatial positive/negative case distribution throughout the city with the most dominant SARS-CoV-2 variant (B.1-C15324T), the focus of this study, highlighted in turquoise. B) Epidemiological curve for Basel-City and distribution of phylogenetic lineages (pangolin nomenclature) from 25<sup>th</sup> of February to 22<sup>nd</sup> of April 2020. C) Summary for inferred phylogenetic clusters within (i) all lineages and (ii) the major variant B.1-C15324T in tertiles of median income. High number of infected people within a tertile with a low number of clusters indicates presence of large transmission clusters whereas large number of clusters and low number of people infected within a tertile indicates random infections and cryptic transmission. D) Visualisation of a significance test for transmission within (indicated on circle edges) and among (intra circle connections) tertiles of median income. E) Results of a significance test for transmission between tertiles of different socioeconomic factors. T1: low, T2: intermediate, T3: high, N/A: no available data or censored for privacy reasons.

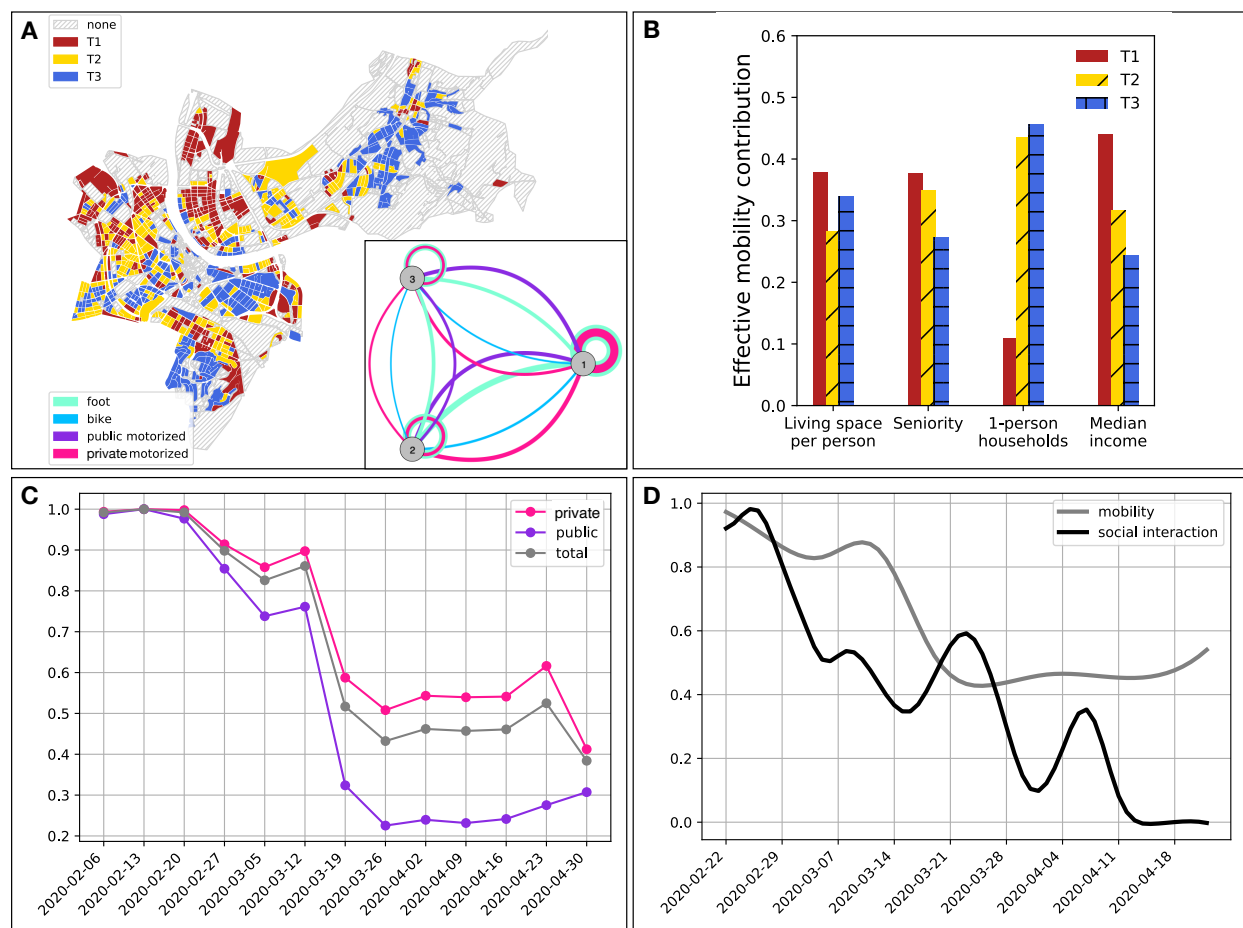

Figure 2: Spatio-temporal variation of mobility patterns within the Canton of Basel-City. A) Basel-City and its delineation with respect to statistical blocks colored according to the partition into tertiles T1, T2, and T3 of increasing median income. Inset: resulting mobility-graph, with nodes representing tertiles and edge-widths representing the strength of effective connectedness through mobility by means of various modes of transport, as computed from the traffic-model provided by the traffic department of the Canton of Basel-City. B) Relative mean contribution of mobility to a socioeconomic tertile's effective reproductive number associated with the major variant B.1-C15324T. C) Normalized temporal development of private and public transport as well as their weighted sum during the first wave of the pandemic in Basel-City. D) Smoothed relative temporal development of social interaction and mobility contribution to the effective reproductive number associated with the major variant B.1-C15324T.

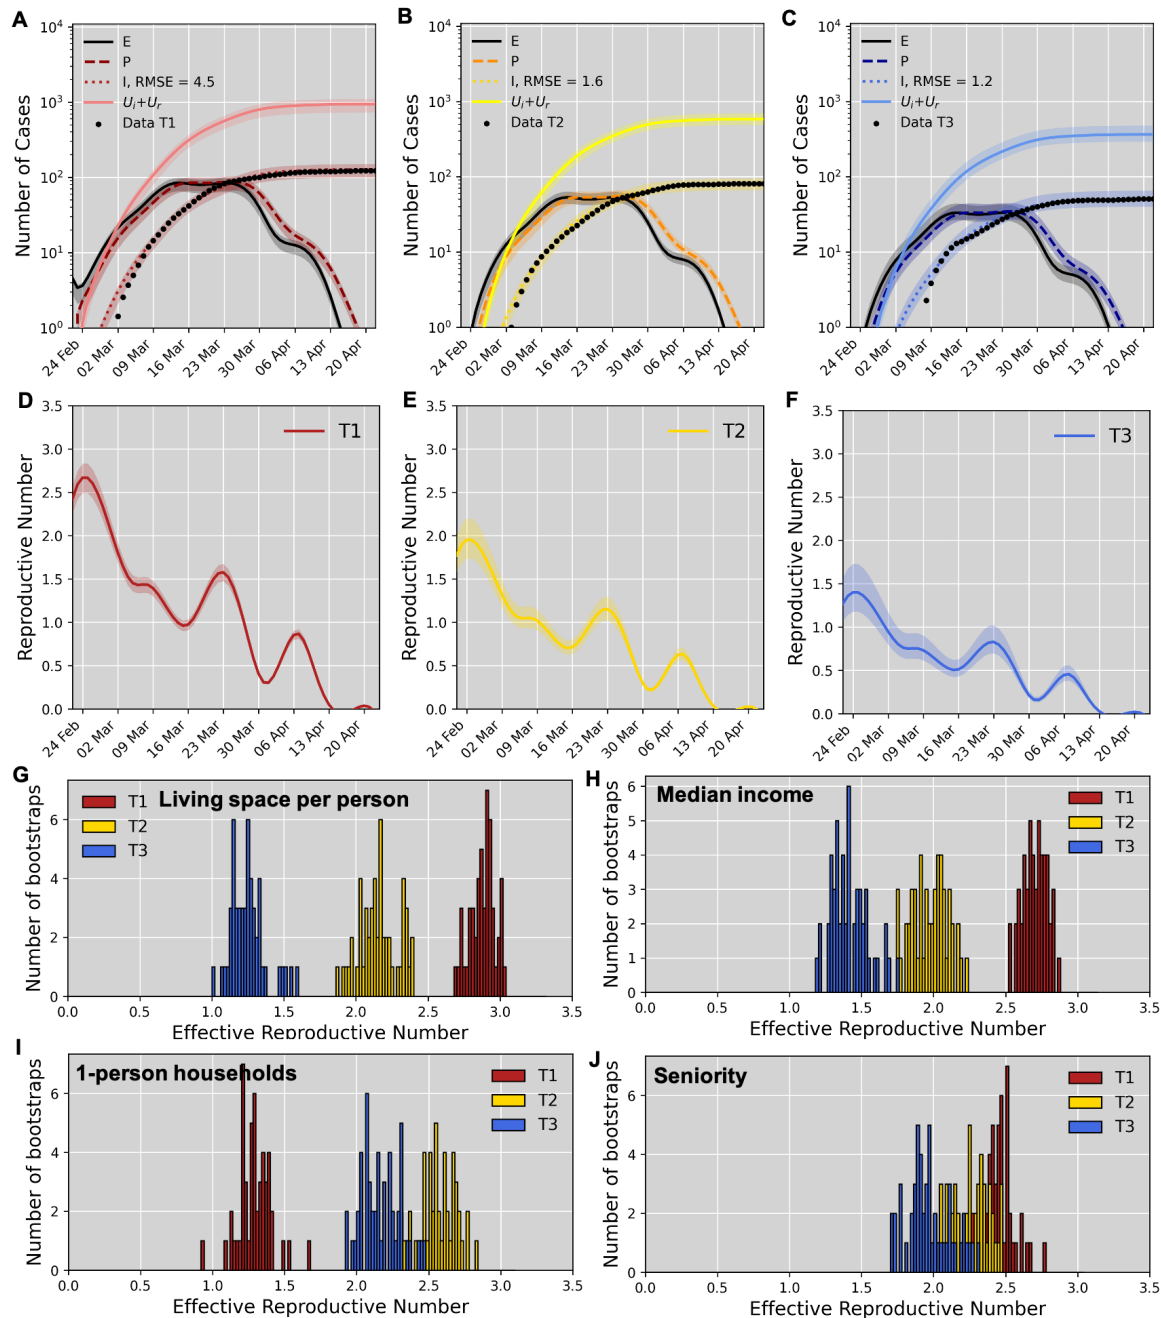

Figure 3: Model fit to the case number time-series. A-C) Fit results for a partition based on median income. Data points are shown together with model predictions based on undisturbed data (solid lines), and fifty bootstraps from disturbed data (bands) for the different tertiles T1 (low, A), T2 (intermediate, B) and T3 (high median income, C). D-F) The dynamic variation of the effective reproductive number for each of the tertiles shown in A-C. G-J) Histograms over all bootstraps for the effective, pre-lockdown reproductive number for each socioeconomic partition. Results are shown for partitions based on living space per person (G), median income (H), share of 1-person households (I), and share of senior residents (J).



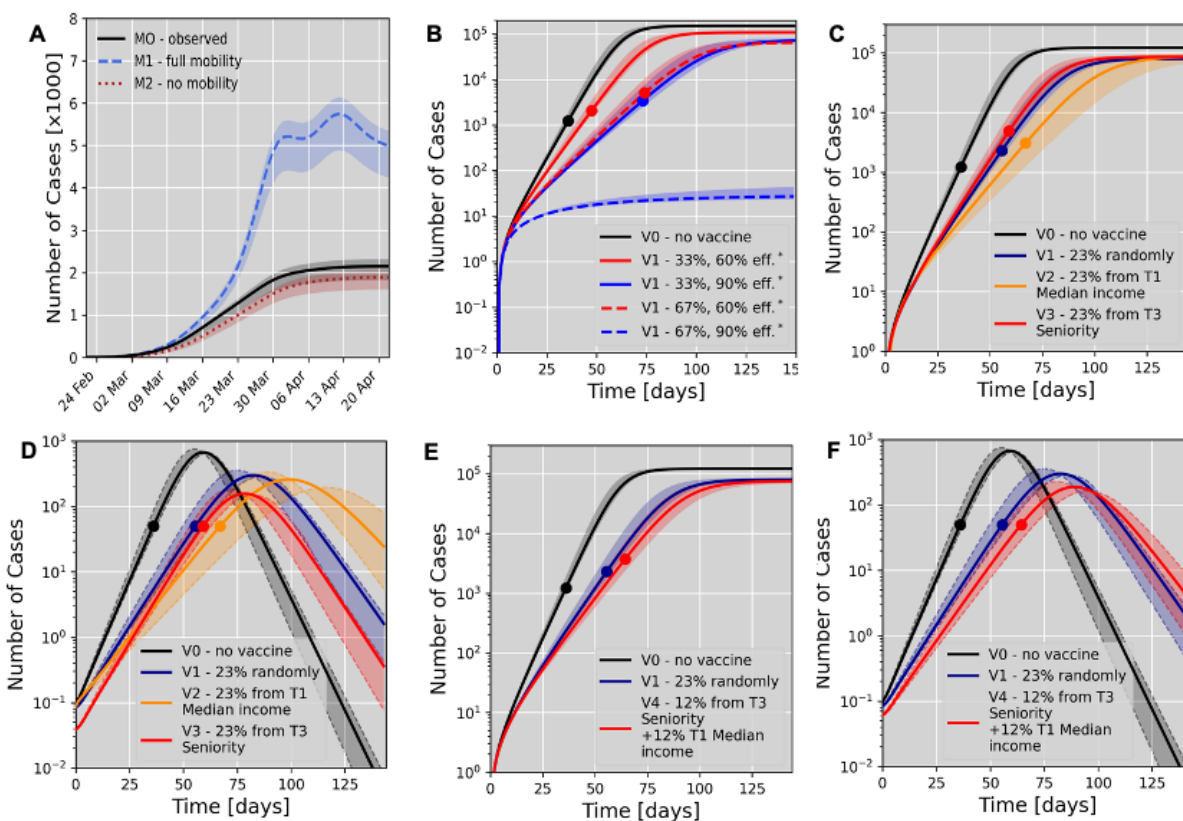

Figure 4: Scenario simulations for a partition based on median income. A) Influence of the mobility pattern on the total number of infected cases during the first wave (sum of reported and unreported cases) modelling either no change in mobility (no lockdown scenario, M1), or full shut-down of all inner city mobility (M2). For comparison the observed scenario (MO) is shown. B) Simulation of future vaccination effects if a specific percentage of all citizens was randomly selected for vaccination at given efficacy (V1). We compare this to the scenario of no vaccine (V0). \* Here vaccination of different population fractions at either 60% or 90% efficacy to prevent SARS-CoV-2 transmission were modelled. C) Simulation of future vaccination effects based on a partition according to median income. Scenario V2 models vaccination of 23% of all citizens selected from the tertile with the lowest median income (T1). Scenario V3 models vaccination of 23% of all citizens selected from the tertile with the highest share of senior residents (T3). In C and E we model 90% vaccine efficacy (transmission and severe COVID-19) and compare with scenarios V0 and V1. Dots indicate the time of reaching a 50% ICU occupancy. D) Temporal evolution of ICU occupancy for the scenarios modelled in C. E) Simulation of a mixed vaccination strategy giving equal priority to senior citizens and mobile population groups. F) Temporal evolution of ICU occupancy for the scenarios modelled in E).

411 **Acknowledgements** We greatly appreciate the input and data received from Construction- and Traffic  
412 department Canton Basel-City, Baselland Transport AG, Basler Verkehrs-Betriebe, Autobus AG Liestal,  
413 SBB Federal Railways, Statistical Office of the Canton of Basel-City, and want to specifically thank Björn  
414 Lietzke, Lukas Mohler, and Madeleine Imhof (all Statistical Office of the Canton of Basel-City), from  
415 Construction- and Traffic Department of the Canton of Basel-City Michael Redle and Kathrin Grotrian,  
416 Matthias Hofmann (Basler Verkehrs-Betrieb), Roman Stingelin (Autobus AG), Nadine Ruch (SBB AG) and  
417 Stefan Burtschi (Baselland Transport AG) for their support. We thank Christine Kiessling, Magdalena  
418 Schneider, Elisabeth Schultheiss, Clarisse Straub, and Rosa-Maria Vesco (University Hospital Basel) for  
419 excellent technical assistance with next generation sequencing. Computations were performed at sci-  
420 CORE (<http://scicore.unibas.ch>) scientific computing facility at the University of Basel. Data exchange  
421 was organized via the BioMedIT node between the University of Basel and ETH Zurich, Department of  
422 Biosystem Science and Engineering. We thank all authors, who have shared their genomic data on GI-  
423 SAID, especially the Stadler Lab from ETH Zurich for sharing Swiss sequences. A full table (csv) outlining  
424 the originating and submitting labs is included as a supplementary file. This study was supported by  
425 the Alfried Krupp Prize for Young University Teachers of the Alfried Krupp von Bohlen und Halbach-  
426 Stiftung (KB). We finally thank Dr. A. Jermy (Geminate Science Consulting) for his critical review of the  
427 manuscript.

428 **Author contributions** AE, HHH, KB devised the project. SCB and JK developed and performed the  
429 mathematical modelling. MSt performed and interpreted phylogenetic analyses. SCB, JK and MSt led  
430 the writing and revising of the report. AM provided the genome assembly pipeline. TCR and HSS pre-  
431 pared viral RNA for sequencing. MyB and RSS provided geographical expertise. RSS provided detailed  
432 background on the representative status of Basel-City. KKS collected clinical data. KR, DAT, AG, AKS,

433 MSch analysed serology samples. DC and OD provided serology samples from Viollier AG. KL provided  
434 virological expertise. AB provided serology samples from the blood transfusion service. JB, STS and SF  
435 provided public health and epidemiological expertise. HP, MSi, CHN, RB, MB provided clinical exper-  
436 tise and valuable discussion on the results. NR, UH, JB provided epidemiological expertise. All author  
437 reviewed and edited the manuscript.

438 **Competing Interests** The authors declare that they have no competing financial interests.

439 **Correspondence** Correspondence and requests for materials should be addressed to Adrian Egli,  
440 [adrian.egli@usb.ch](mailto:adrian.egli@usb.ch), Clinical Bacteriology and Mycology, University Hospital Basel, Petersgraben,  
441 CH-4031 Basel, Switzerland, Phone: +41 61 556 57 49.

442

443 **Data Availability** The SEIR-model code used for this submission will be available on <https://github.com/BorgwardtLab>  
444 Code that was used for phylogenetic inference and calculation of significance of clusters in specified  
445 groups is available at <https://github.com/appliedmicrobiologyresearch>. SARS-CoV-2 whole genomes  
446 from Basel-City are available at [gisaid.com](https://gisaid.com) and at European Nucleotide Archive (ENA) under accession  
447 number PRJEB39887.

448

449 **Ethical statement** Ethical approval was given by the local ethical committee *Ethik Kommission Nord-*  
450 *west und Zentralschweiz* (EKNZ No. 2020-00769, to be found at <https://ongoingprojects.swissethics.ch>)  
451 and the project was registered at [clinicaltrials.gov](https://clinicaltrials.gov) under NCT04351503.

## 452 References

- 453 1. Yuan, F., Wang, L., Fang, Y. & Wang, L. Global SNP analysis of 11,183 SARS-CoV-2  
454 strains reveals high genetic diversity. *Transboundary and emerging diseases* (2020). URL  
455 <http://www.ncbi.nlm.nih.gov/pubmed/33207070>.
- 456
- 457 2. Nabil, B., Sabrina, B. & Abdelhakim, B. Transmission route and introduction of  
458 pandemic SARS-CoV-2 between China, Italy, and Spain. *Journal of medical vi-*  
459 *rology* (2020). URL <http://www.ncbi.nlm.nih.gov/pubmed/32697346>  
460 <http://www.pubmedcentral.nih.gov/articlerender.fcgi?artid=PMC7404595>.
- 461 3. Hadfield, J. *et al.* NextStrain: Real-time tracking of pathogen evolution. *Bioinformatics* **34**,  
462 4121–4123 (2018). URL <https://pubmed.ncbi.nlm.nih.gov/29790939/>.
- 463 4. Worobey, M. *et al.* The emergence of SARS-CoV-2 in Europe and  
464 North America. *Science (New York, N.Y.)* **370**, 564–570 (2020). URL  
465 <https://science.sciencemag.org/content/370/6516/564.full>.
- 466 5. Popa, A. *et al.* Genomic epidemiology of superspreading events in Austria reveals mu-  
467 tational dynamics and transmission properties of SARS-CoV-2. *Science translational*  
468 *medicine* (2020). URL <http://www.ncbi.nlm.nih.gov/pubmed/33229462>.
- 469 6. Candido, D. S. *et al.* Evolution and epidemic spread of SARS-  
470 CoV-2 in Brazil. *Science (New York, N.Y.)* **369**, 1255–1260 (2020).

- 471 URL <http://www.ncbi.nlm.nih.gov/pubmed/32703910>
- 472 <http://www.pubmedcentral.nih.gov/articlerender.fcgi?artid=PMC7402630>.
- 473 7. Salje, H. *et al.* Estimating the burden of SARS-CoV-2 in France. *Science (New York, N.Y.)*
- 474 **369**, 208–211 (2020). URL <http://www.ncbi.nlm.nih.gov/pubmed/32404476>
- 475 <http://www.pubmedcentral.nih.gov/articlerender.fcgi?artid=PMC7223792>.
- 476 8. Gudbjartsson, D. F. *et al.* Spread of SARS-CoV-2 in the Icelandic Population. *New England*
- 477 *Journal of Medicine* **382**, 2302–2315 (2020).
- 478 9. Post, L. A. *et al.* A SARS-CoV-2 Surveillance System in Sub-Saharan Africa: Modeling Study
- 479 for Persistence and Transmission to Inform Policy. *Journal of medical Internet research*
- 480 **22**, e24248 (2020). URL <http://www.ncbi.nlm.nih.gov/pubmed/33211026>
- 481 <http://www.pubmedcentral.nih.gov/articlerender.fcgi?artid=PMC7683024>.
- 482 10. Puenpa, J. *et al.* Molecular epidemiology of the first wave of severe acute respiratory syn-
- 483 drome coronavirus 2 infection in Thailand in 2020. *Scientific Reports* **10** (2020). URL
- 484 <https://pubmed.ncbi.nlm.nih.gov/33024144/>.
- 485 11. Du, P. *et al.* Genomic surveillance of COVID-19 cases in Beijing. *Nature communica-*
- 486 *tions* **11**, 5503 (2020). URL <http://www.ncbi.nlm.nih.gov/pubmed/33127911>
- 487 <http://www.pubmedcentral.nih.gov/articlerender.fcgi?artid=PMC7603498>.
- 488 12. Lemieux, J. *et al.* Phylogenetic analysis of SARS-CoV-2 in the Boston
- 489 area highlights the role of recurrent importation and superspread-
- 490 ing events. *medRxiv : the preprint server for health sciences* **12**, 15

- 491 (2020). URL <http://www.ncbi.nlm.nih.gov/pubmed/32869040>  
492 <http://www.pubmedcentral.nih.gov/articlerender.fcgi?artid=PMC7457619>.
- 493 13. Long, S. W. *et al.* Molecular Architecture of Early Dissemination and Mas-  
494 sive Second Wave of the SARS-CoV-2 Virus in a Major Metropolitan Area.  
495 *medRxiv* (2020). URL <http://www.ncbi.nlm.nih.gov/pubmed/33024977>  
496 <http://www.pubmedcentral.nih.gov/articlerender.fcgi?artid=PMC7536878>.
- 497 14. Maurano, M. T. *et al.* Sequencing identifies multiple early introductions of SARS-  
498 CoV-2 to the New York City region. *Genome research* **30**, 1781–1788 (2020). URL  
499 <http://www.ncbi.nlm.nih.gov/pubmed/33093069>.
- 500 15. Bushman, D. *et al.* Detection and Genetic Characterization of  
501 Community-Based SARS-CoV-2 Infections - New York City, March  
502 2020. *MMWR. Morbidity and mortality weekly report* **69**, 918–922  
503 (2020). URL <http://www.ncbi.nlm.nih.gov/pubmed/32678072>  
504 <http://www.pubmedcentral.nih.gov/articlerender.fcgi?artid=PMC7366849>.
- 505 16. Kissler, S. M. *et al.* Reductions in commuting mobility correlate with geographic  
506 differences in SARS-CoV-2 prevalence in New York City. *Nature communications*  
507 **11**, 4674 (2020). URL <http://www.ncbi.nlm.nih.gov/pubmed/32938924>  
508 <http://www.pubmedcentral.nih.gov/articlerender.fcgi?artid=PMC7494926>.
- 509 17. EUROSTAT. Population Data Collection for European Lo-  
510 cal Administrative Units from 1960 onward (2011). URL

- 511 <https://ec.europa.eu/eurostat/web/nuts/local-administrative-units>.
- 512 18. De Ridder, D. *et al.* Socioeconomically disadvantaged neighborhoods face increased  
513 persistence of sars-cov-2 clusters. *Frontiers in Public Health* **8**, 1091 (2021). URL  
514 <https://www.frontiersin.org/article/10.3389/fpubh.2020.626090>.
- 515 19. Chang, S. *et al.* Mobility network models of COVID-19 ex-  
516 plain inequities and inform reopening. *Nature* (2020). URL  
517 <http://www.nature.com/articles/s41586-020-2923-3>.
- 518 20. Koo, J. R. *et al.* Interventions to mitigate early spread of SARS-CoV-2 in Singa-  
519 pore: a modelling study. *The Lancet Infectious Diseases* **20**, 678–688 (2020). URL  
520 <https://linkinghub.elsevier.com/retrieve/pii/S1473309920301626>.
- 521 21. Mansilla Domínguez, J. M. *et al.* Risk Perception of COVID-19 Community Transmission  
522 among the Spanish Population. *International journal of environmental research and public*  
523 *health* **17** (2020). URL <http://www.ncbi.nlm.nih.gov/pubmed/33276532>.
- 524 22. Ragonnet-Cronin, M. *et al.* Automated analysis of phylogenetic clusters. *BMC Bioinformat-*  
525 *ics* **14**, 317 (2013).
- 526 23. Stange, M. *et al.* SARS-CoV-2 outbreak in a tri-national urban area is domi-  
527 nated by a B.1 lineage variant linked to a mass gathering event. *medRxiv; ac-*  
528 *cepted for publication in PLOS Pathogens* 2020.09.01.20186155 (2021). URL  
529 <https://doi.org/10.1101/2020.09.01.20186155>.

- 530 24. Bau- und Verkehrsdepartement Basel-Stadt Mobilität / Mobilitätsstrategie.  
531 Gesamtverkehrsmodell der Region Basel, Basismodell: “Ist-Zustand 2016” (2020).
- 532 25. Kalman, R. E. *et al.* Contributions to the theory of optimal control. *Bol. soc. mat. mexicana*  
533 **5**, 102–119 (1960).
- 534 26. Welch, G., Bishop, G. *et al.* An introduction to the kalman filter (1995).
- 535 27. Chinazzi, M. *et al.* The effect of travel restrictions on the spread of the 2019  
536 novel coronavirus (COVID-19) outbreak. *Science* **368**, 395–400 (2020). URL  
537 <https://www.sciencemag.org/lookup/doi/10.1126/science.aba9757>.
- 538 28. Li, R. *et al.* Substantial undocumented infection facilitates the rapid dissemi-  
539 nation of novel coronavirus (SARS-CoV-2). *Science* **368**, 489–493 (2020). URL  
540 <https://www.sciencemag.org/lookup/doi/10.1126/science.abb3221>.
- 541 29. He, X. *et al.* Temporal dynamics in viral shedding and transmis-  
542 sibility of COVID-19. *Nature Medicine* **26**, 672–675 (2020). URL  
543 <https://www.nature.com/articles/s41591-020-0869-5>.
- 544 30. AstraZeneca. AZD1222 vaccine met primary efficacy endpoint in preventing COVID-19  
545 (2020).
- 546 31. Mahase, E. Covid-19: Moderna vaccine is nearly 95% effective, trial involving high risk and  
547 elderly people shows. *BMJ: British Medical Journal (Online)* **371** (2020).



- 548 32. Dagan, N. *et al.* Bnt162b2 mrna covid-19 vaccine in a nation-  
549 wide mass vaccination setting. *New England Journal of Medicine*  
550 **0**, null (0). URL <https://doi.org/10.1056/NEJMoa2101765>.  
551 <https://doi.org/10.1056/NEJMoa2101765>.
- 552 33. Jay, J. *et al.* Neighbourhood income and physical distancing during the COVID-  
553 19 pandemic in the United States. *Nature human behaviour* (2020). URL  
554 <http://www.ncbi.nlm.nih.gov/pubmed/33144713>.
- 555 34. De Ridder, D. *et al.* Socioeconomically Disadvantaged Neighborhoods Face In-  
556 creased Persistence of SARS-CoV-2 Clusters. *Frontiers in Public Health* **8** (2021). URL  
557 <https://www.frontiersin.org/articles/10.3389/fpubh.2020.626090/full>.
- 558 35. Bluhm, A. *et al.* SARS-CoV-2 transmission routes from genetic  
559 data: A Danish case study. *PLOS ONE* **15**, e0241405 (2020). URL  
560 <https://dx.plos.org/10.1371/journal.pone.0241405>.
- 561 36. United Nations, Department of Economic and Social Affairs, Population Division.  
562 *World Urbanization Prospects: The 2018 Revision* (United Nations, New York, 2019). URL  
563 <https://population.un.org/wup/Publications/Files/WUP2018-Report.pdf>.
- 564 37. European Commission. GDP per capita, consumption per capita and price level indices  
565 (2021). URL <https://ec.europa.eu/eurostat/statistics-explained/index.php/GDP>.
- 566 38. Rader, B. *et al.* Crowding and the shape of COVID-19 epidemics. *Nature Medicine* **26**, 1829–  
567 1834 (2020). URL [nature.com/articles/s41591-020-1104-0#citeas](https://www.nature.com/articles/s41591-020-1104-0#citeas).

- 568 39. Douglas, J. *et al.* Phylodynamics reveals the role of human travel and contact tracing in  
569 controlling COVID-19 in four island nations. *medRxiv* (2020).
- 570 40. Burki, T. Mass testing for COVID-19. *The Lancet Microbe* **1**, e317 (2020). URL  
571 <https://linkinghub.elsevier.com/retrieve/pii/S2666524720302056>.
- 572 41. Reeves, R. & Rothwell, J. Class and covid: How the less affluent face double risks. *brookings*  
573 (march 27) (2020).
- 574 42. Rodríguez-Barranco, M. *et al.* The spread of SARS-CoV-2 in Spain: Hygiene habits, so-  
575 ciodemographic profile, mobility patterns and comorbidities. *Environmental Research* **192**,  
576 110223 (2021).
- 577 43. Wilson, C. These graphs show how covid-19 is ravaging new york city's low-income neigh-  
578 borhoods. *Time* (2020).
- 579 44. Swan, D. A. *et al.* Vaccines that prevent sars-cov-2 transmission may prevent or  
580 dampen a spring wave of covid-19 cases and deaths in 2021. *medRxiv* (2020). URL  
581 <https://www.medrxiv.org/content/early/2020/12/14/2020.12.13.20248120>.  
582 <https://www.medrxiv.org/content/early/2020/12/14/2020.12.13.20248120.full>
- 583 45. Moghadas, S. M. *et al.* The impact of vaccination on COVID-19 out-  
584 breaks in the United States. *medRxiv : the preprint server for health sci-*  
585 *ences* (2020). URL <http://www.ncbi.nlm.nih.gov/pubmed/33269359>  
586 <http://www.pubmedcentral.nih.gov/articlerender.fcgi?artid=PMC7709178>.

- 587 46. Anderson, R. M., Vegvari, C., Truscott, J. & Collyer, B. S. Challenges in creating herd immu-  
588 nity to SARS-CoV-2 infection by mass vaccination. *The Lancet* **396**, 1614–1616 (2020). URL  
589 <https://linkinghub.elsevier.com/retrieve/pii/S0140673620323187>.
